1                   **Identification of *Klebsiella pneumoniae* complex members**  
2                   **using MALDI-TOF mass spectrometry**

3  
4                   Carla Rodrigues,<sup>a</sup> Virginie Passet,<sup>a</sup> Sylvain Brisse<sup>a#</sup>

5  
6                   <sup>a</sup> Biodiversity and Epidemiology of Bacterial Pathogens, Institut Pasteur, Paris, France.

7  
8  
9  
10                  **Running title:** *K. pneumoniae* phylogroups identified by MALDI-TOF MS

11  
12                  **Keywords:** *Klebsiella pneumoniae*, phylogroups, MALDI-TOF MS, identification, biomarkers

13  
14                  **#Corresponding author**

15                  Sylvain Brisse

16                  Biodiversity & Epidemiology of Bacterial Pathogens

17                  Institut Pasteur

18                  25 Rue du Docteur Roux

19                  75015 Paris Cedex 15,

20                  France

21                  Telephone: +331 45 68 83 34

22                  E-mail: [sylvain.brisse@pasteur.fr](mailto:sylvain.brisse@pasteur.fr)

23

24

25

26

27

28

29 **ABSTRACT**

30 *Klebsiella pneumoniae* (phylogroup Kp1), one of the most problematic pathogens associated  
31 with antibiotic resistance worldwide, is phylogenetically closely related to *K. quasipneumoniae*  
32 [subsp. *quasipneumoniae* (Kp2) and subsp. *similipneumoniae* (Kp4)], *K. variicola* (Kp3) and two  
33 unnamed phylogroups (Kp5 and Kp6). Together, Kp1 to Kp6 make-up the *K. pneumoniae* complex.  
34 Currently, the phylogroups can be reliably identified only by gene sequencing. Misidentification using  
35 standard methods is common and the clinical significance of *K. pneumoniae* complex members is  
36 therefore imprecisely defined. Here, we evaluated the potential of MALDI-TOF mass spectrometry to  
37 discriminate *K. pneumoniae* complex members. We report for the first time the existence of mass  
38 spectrometry biomarkers associated with the phylogroups, with a sensitivity and specificity ranging  
39 between 80-100% and 97-100%, respectively. Strains within phylogroups Kp1, Kp2, Kp4 and Kp5  
40 each shared two specific peaks not observed in other phylogroups. Kp3 strains shared a peak that was  
41 only observed otherwise in Kp5. Finally, Kp6 had a diagnostic peak shared only with Kp1. Kp3 and  
42 Kp6 could therefore be identified by exclusion criteria (lacking Kp5 and Kp1-specific peaks,  
43 respectively). Further, ranked Pearson correlation clustering of spectra grouped strains according to  
44 their phylogroup. These results call for incorporation of spectra of all *K. pneumoniae* complex  
45 members into reference MALDI-TOF spectra databases, in which they are currently lacking. This  
46 advance may allow for simple and precise identification of *K. pneumoniae* and closely related species,  
47 opening the way to a better understanding of their epidemiology, ecology and pathogenesis.

48           **INTRODUCTION**

49           *Klebsiella pneumoniae* is an increasingly challenging human bacterial pathogen, causing  
50 hospital or community-acquired infections that are associated with high rates of antibiotic resistance  
51 (1, 2). Population diversity studies have shown that *K. pneumoniae* is in fact part of a complex of  
52 species, being phylogenetically closely related to *K. quasipneumoniae* (subsp. *quasipneumoniae* and  
53 subsp. *similipneumoniae*) and *K. variicola* (3–5). Before recent taxonomic updates (6, 7), *K.*  
54 *pneumoniae* and the other above taxa were designed as *K. pneumoniae* phylogroups Kp1, Kp2, Kp4  
55 and Kp3, respectively (8). Together with two novel phylogroups (Kp5 and Kp6) described recently  
56 (5), these taxa constitute the *K. pneumoniae* complex. Although *K. pneumoniae* is numerically the  
57 major cause of human infections among members of the complex, the involvement of the other  
58 members of the complex in human infections is gaining recognition (4, 8–12). However, the  
59 unsuitability of traditional clinical microbiology methods to distinguish species within the complex  
60 leads to high rates of misidentifications (most often as *K. pneumoniae*) that are masking the true  
61 clinical significance of each phylogroup and their potential epidemiological specificities (8, 9, 12, 13).  
62 In fact, the different members of the *K. pneumoniae* complex can be reliably identified only based on  
63 gene sequencing (e.g. *bla*<sub>LEN</sub>, *bla*<sub>OKP</sub>, *bla*<sub>SHV</sub>, *rpoB*, *gyrA*, *parC*) (4, 7, 14). Some PCR-based  
64 identification methods were developed but they are prone to errors or do not distinguish all  
65 phylogroups (8, 15–17). Clearly, there is a need for reliable, cost-effective and fast identification  
66 methods able to discriminate members of the *K. pneumoniae* complex.

67           Matrix-assisted laser desorption ionization-time of flight (MALDI-TOF) mass spectrometry  
68 (MS) has revolutionized routine identification of microorganisms, being a fast and cost-effective  
69 technique. It now represents a first line identification method in many clinical, environmental and food  
70 microbiology laboratories (18). In the case of the *K. pneumoniae* complex, MALDI-TOF MS  
71 identification remains largely unsatisfactory given the absence of well characterized, representative  
72 members of the complex in spectral databases. Currently, only *K. pneumoniae* and *K. variicola* are  
73 included in the Bruker database ([https://www.bruker.com/fileadmin/user\\_upload/1-  
74 Products/Separations\\_MassSpectrometry/MALDI\\_Biotyper/US\\_CA\\_System/MBT\\_list\\_of\\_organisms  
75 \\_10\\_2017.pdf](https://www.bruker.com/fileadmin/user_upload/1-Products/Separations_MassSpectrometry/MALDI_Biotyper/US_CA_System/MBT_list_of_organisms_10_2017.pdf)), and identification of even these two species is imprecise given the lack of reference

76 spectra of other phylogroups (13, 19). To address this important limitation of currently MALDI-TOF  
77 MS technology, we used a collection of well characterized reference strains from the six *K.*  
78 *pneumoniae* complex phylogroups and analyzed them by MALDI-TOF MS in order to define the  
79 potential of this method to identify species within the *K. pneumoniae* complex.

80

## 81 MATERIAL AND MEHODS

82 **Bacterial strains.** A set of 46 strains previously characterized by whole-genome sequencing  
83 or using core gene sequences (5, 7, 20, 21) were analyzed in this study (Table S1). The strains  
84 belonged to the taxa *K. pneumoniae* (*sensu stricto*, i.e., Kp1; n=10), *K. quasipneumoniae* subsp.  
85 *quasipneumoniae* (Kp2, n=9), *K. quasipneumoniae* subsp. *similipneumoniae* (Kp4, n=7), *K. variicola*  
86 (Kp3, n=9), and to two taxonomically undefined lineages named Kp5 (n=6) and Kp6 (n=5). Strains  
87 had been stored in brain heart infusion broth containing 25% glycerol at -80°C and were sub-  
88 cultivated before use in this study.

89 **Spectra acquisition.** An overnight culture on Luria-Bertani agar (37°C, 18h) was used to  
90 prepare the samples with the ethanol/formic acid extraction procedure following the manufacturer  
91 recommendations (Bruker Daltonics, Bremen, Germany). Samples (1 µL) were spotted onto an MBT  
92 Biotarget 96 target plate, air dried and overlaid with 1 µL of a saturated  $\alpha$ -cyano-4-hydroxycinnamic  
93 acid (HCCA) matrix solution in 50% of acetonitrile and 2.5% of trifluoroacetic acid. Mass spectra  
94 were acquired on a Microflex LT mass spectrometer (Bruker Daltonics, Bremen, Germany) using the  
95 default parameters (detection in linear positive mode, laser frequency of 60 Hz, ion source voltages of  
96 2.0 and 1.8 kV, lens voltage of 6 kV) within the mass range of 2,000-20,000 Da. For each strain, a  
97 total of 24 spectra from 8 independent spots were acquired (3 spectra *per* spot, instrumental  
98 replicates). External calibration of the mass spectra was performed using Bruker Bacterial Test  
99 Standard (BTS).

100 **Spectra analysis.** The spectra were preprocessed by applying the “smoothing” and “baseline  
101 subtraction” procedures available in FlexAnalysis software (Bruker Daltonics, Bremen, Germany),  
102 exported as peak lists with  $m/z$  values and signal intensities for each peak in text format, and imported  
103 into a dedicated BioNumerics v7.6 (Applied Maths, Ghent, Belgium) database. Peak detection was

104 performed in BioNumerics using a signal to noise ratio of 20. The instrumental replicates (24 spectra  
105 for each strain) were used to generate a mean spectrum for each strain using the following parameters:  
106 minimum similarity, 80%; minimum peak detection rate, 60%; constant tolerance, 1; and linear  
107 tolerance, 300 ppm. Finally, peak matching was performed to search all distinct peaks (called peak  
108 classes in BioNumerics) using as parameters: constant tolerance, 1.9; linear tolerance, 550 ppm;  
109 maximum horizontal shift, 1; peak detection rate, 10. The discriminating value of each resulting peak  
110 was evaluated by a Mann-Whitney test (22). To allocate proteins associated with peaks, the online tool  
111 TagIdent was used (<http://web.expasy.org/tagident/>). Additionally, a Neighbor Joining tree based on  
112 ranked Pearson coefficient was constructed using BioNumerics.

113

## 114 RESULTS AND DISCUSSION

115 Forty-six reference strains representing the six phylogroups currently known within the  
116 *K. pneumoniae* complex were analyzed by MALDI-TOF MS. Based on the MALDI Biotyper  
117 Compass database version 4.1.80 (Bruker Daltonics, Bremen, Germany), the 46 strains were identified  
118 either as *K. pneumoniae* (31 strains, all belonging to Kp1, Kp2, Kp4 and Kp6) or as *K. variicola* (15  
119 strains, all strains of Kp3 and Kp5). Identification scores ranged between 2.16-2.56 for *K. pneumoniae*  
120 and 1.89-2.55 for *K. variicola*. Of note, in two cases a replicate was reported in one measure as *K.*  
121 *pneumoniae* and in other as *K. variicola*. These data highlight the need to update the database in order  
122 to refine confidence in *K. pneumoniae/K. variicola* identification and to enable identification of *K.*  
123 *quasipneumoniae* and novel phylogroups. **Fig. 1** summarizes the peak positions found in each strain.  
124 Most (about 97%) of the peaks were concentrated in the region below 10,000 *m/z* and almost no peak  
125 was found above this value. The similarity among spectra within the *K. pneumoniae* complex was  
126 always above 87% (data not shown), with peaks at 4363, 5379, 6286, 6298, 7241 and 9473 *m/z* being  
127 found in all the members of the complex. Interestingly, ten specific biomarkers associated with  
128 specific members of the *K. pneumoniae* complex were identified. These peaks were located within the  
129 range 3835 - 9553 *m/z*. The specificity and sensitivity of their distribution among phylogroups ranged  
130 between 97-100% and 80-100%, respectively (**Fig. 1 and Table 1**). Kp1 (4152 and 8305 *m/z*), Kp2  
131 (4136 and 8271 *m/z*), Kp4 (7670 and 3835 *m/z*) and Kp5 (4777 and 9553 *m/z*) each presented two

132 specific peaks, which may allow their unambiguous identification. Kp3 strains shared a peak that was  
133 only observed otherwise in Kp5 (7768  $m/z$ ). Finally, Kp6 had a diagnostic peak (5278  $m/z$ ) shared  
134 only with Kp1. Kp3 and Kp6 could therefore be identified by exclusion criteria (lacking Kp5 and Kp1-  
135 specific peaks, respectively) (**Fig. 1 and Table 1**). These data reveal the possibility to identify  
136 precisely an isolate of the Kp complex based on the specific combination of the above described  
137 peaks. To the best of our knowledge, this is the first time that mass spectrometry biomarkers that  
138 discriminate the phylogroups of the *K. pneumoniae* complex are described. Furthermore, cluster  
139 analysis grouped all strains according to their phylogroup (**Fig. S1**), also showing the potential of  
140 whole spectrum comparison for strain identification at the phylogroup level.

141 About half of the peaks visualized in a bacterial spectrum in the mass range used in this work  
142 (2,000-20,000 Da) correspond to ribosomal proteins (18). Here, we were able to presumptively  
143 identify two of the specific peaks as ribosomal proteins (S22 and L31, respectively 5278 and 7768  
144  $m/z$ ), and one as a non-characterized protein specific for Kp4 [7670  $m/z$ , locus tag SB30\_RS24725  
145 (GenBank Accession number CBZR010000000)]. The specificity of the peaks was supported by the  
146 protein alignments obtained from whole-genome sequences (data not shown). The other seven peaks  
147 useful for identification could not be associated with a defined protein (**Table 1**).

148 In conclusion, this work demonstrates the potential of MALDI-TOF MS to identify isolates of  
149 the *K. pneumoniae* complex at the phylogroup level. We urge that reference spectra of the various taxa  
150 of the *K. pneumoniae* complex be incorporated into reference MALDI-TOF spectra databases, so that  
151 the approach could be implemented in microbiology laboratories. Improved identification of  
152 *K. pneumoniae* and related taxa will advance our understanding of the epidemiology, ecology and  
153 links with pathogenesis of this increasingly important group of pathogens.

154

## 155 **Acknowledgments**

156 We thank the Biological Resource Center of Institut Pasteur (Chantal Bizet and Estelle Muhle)  
157 for support within the MALDI-TOF MS platform. We acknowledge Andrianiaina Rakotondrasoa and  
158 Jean-Marc Collard (Institut Pasteur of Madagascar), S. Wesley Long (Houston Methodist Hospital)

159 and David A. Rasko and J. Kristie Johnson (University of Maryland School of Medicine, Baltimore)  
160 for kindly providing strains analyzed in this study.

161 This work is part of the MedVetKlebs project, a component of the One Health European Joint  
162 Programme, which has received funding from the European Union's Horizon 2020 research and  
163 innovation programme under Grant Agreement No 773830.

164

165

#### 166 **Conflicts of interests**

167 The authors declare that there are no conflicts of interest.

168

#### 169 **References**

- 170 1. European Centre for Disease Prevention and Control (ECDC). 2017. Surveillance of  
171 antimicrobial resistance in Europe 2016. Annual report of the European Antimicrobial  
172 REsistance Surveillance Network (EARS-Net).
- 173 2. Wyres KL, Holt KE. 2016. *Klebsiella pneumoniae* population genomics and antimicrobial-  
174 resistant clones. Trends Microbiol 24:944–956.
- 175 3. Brisse S, Verhoef J. 2001. Phylogenetic diversity of *Klebsiella pneumoniae* and *Klebsiella*  
176 *oxytoca* clinical isolates revealed by randomly amplified polymorphic DNA, *gyrA* and *parC*  
177 genes sequencing and automated ribotyping. Int J Syst Evol Microbiol 51:915–924.
- 178 4. Holt KE, Wertheim H, Zadoks RN, Baker S, Whitehouse CA, Dance D, Jenney A, Connor TR,  
179 Hsu LY, Severin J, Brisse S, Cao H, Wilksch J, Gorrie C, Schultz MB, Edwards DJ, Nguyen K  
180 Van, Nguyen TV, Dao TT, Mensink M, Minh V Le, Nhu NTK, Schultsz C, Kuntaman K,  
181 Newton PN, Moore CE, Strugnell RA, Thomson NR. 2015. Genomic analysis of diversity,  
182 population structure, virulence, and antimicrobial resistance in *Klebsiella pneumoniae*, an  
183 urgent threat to public health. Proc Natl Acad Sci U S A 112:E3574-81.
- 184 5. Blin C, Passet V, Touchon M, Rocha EPC, Brisse S. 2017. Metabolic diversity of the emerging  
185 pathogenic lineages of *Klebsiella pneumoniae*. Environ Microbiol 19:1881–1898.
- 186 6. Rosenblueth M, Martínez L, Silva J, Martínez-Romero E. 2004. *Klebsiella variicola*, a novel

- 187 species with clinical and plant-associated isolates. *Syst Appl Microbiol* 27:27–35.
- 188 7. Brisse S, Passet V, Grimont PAD. 2014. Description of *Klebsiella quasipneumoniae* sp. nov., a  
189 novel species isolated from human infections, with two subspecies *Klebsiella quasipneumoniae*  
190 subsp. *quasipneumoniae* subsp. nov. and *Klebsiella quasipneumoniae* subsp. *similipneumoniae*  
191 subsp. nov., and demonstration that *Klebsiella singaporensis* is a junior heterotypic synonym  
192 of *Klebsiella variicola*. *Int J Syst Evol Microbiol* 64:3146–3152.
- 193 8. Brisse S, van Himbergen T, Kusters K, Verhoef J. 2004. Development of a rapid identification  
194 method for *Klebsiella pneumoniae* phylogenetic groups and analysis of 420 clinical isolates.  
195 *Clin Microbiol Infect* 10:942–945.
- 196 9. Seki M, Gotoh K, Nakamura S, Akeda Y, Yoshii T, Miyaguchi S, Inohara H, Horii T, Oishi K,  
197 Iida T, Tomono K, Masafumi Seki C. 2013. Fatal sepsis caused by an unusual *Klebsiella*  
198 species that was misidentified by an automated identification system. *J Med Microbiol* 62:801–  
199 803.
- 200 10. Maatallah M, Vading M, Kabir MH, Bakhrouf A, Kalin M, Nauc ler P, Brisse S, Giske CG.  
201 2014. *Klebsiella variicola* is a frequent cause of bloodstream infection in the Stockholm area,  
202 and associated with higher mortality compared to *K. pneumoniae*. *PLoS One* 9:1–21.
- 203 11. Breurec S, Melot B, Hoen B, Passet V, Schepers K, Bastian S, Brisse S. 2016. Liver abscess  
204 caused by infection with community-acquired *Klebsiella quasipneumoniae* subsp.  
205 *quasipneumoniae*. *Emerg Infect Dis* 22:529–531.
- 206 12. Becker L, Fuchs S, Pfeifer Y, Semmler T, Eckmanns T, Korr G, Sissolak D, Friedrichs M, Zill  
207 E, Tung M-L, Dohle C, Kaase M, Gatermann S, R ussmann H, Steglich M, Haller S, Werner G.  
208 2018. Whole genome sequence analysis of CTX-M-15 Producing *Klebsiella* isolates allowed  
209 dissecting a polyclonal outbreak scenario. *Front Microbiol* 9:322.
- 210 13. Long SW, Linson SE, Ojeda Saavedra M, Cantu C, Davis JJ, Brettin T, Olsen RJ. 2017.  
211 Whole-Genome sequencing of human clinical *Klebsiella pneumoniae* isolates reveals  
212 misidentification and misunderstandings of *Klebsiella pneumoniae*, *Klebsiella variicola*, and  
213 *Klebsiella quasipneumoniae*. *mSphere* 2:e00290-17.
- 214 14. Haeggman S, Lofdahl S, Paauw A, Verhoef J, Brisse S. 2004. Diversity and evolution of the



- 215 class A chromosomal beta-lactamase gene in *Klebsiella pneumoniae*. *Antimicrob Agents*  
216 *Chemother* 48:2400–2408.
- 217 15. Fonseca EL, Ramos N da V, Andrade BGN, Morais LLCS, Marin MFA, Vicente ACP. 2017.  
218 A one-step multiplex PCR to identify *Klebsiella pneumoniae*, *Klebsiella variicola*, and  
219 *Klebsiella quasipneumoniae* in the clinical routine. *Diagn Microbiol Infect Dis* 87:315–317.
- 220 16. Garza-Ramos U, Silva-Sánchez J, Martínez-Romero E, Tinoco P, Pina-Gonzales M, Barrios H,  
221 Martínez-Barnetche J, Gómez-Barreto RE, Tellez-Sosa J. 2015. Development of a Multiplex-  
222 PCR probe system for the proper identification of *Klebsiella variicola*. *BMC Microbiol* 15:1–  
223 14.
- 224 17. Bialek-Davenet S, Criscuolo A, Ailloud F, Passet V, Nicolas-Chanoine MH, Decré D, Brisse S.  
225 2014. Development of a multiplex PCR assay for identification of *Klebsiella pneumoniae*  
226 hypervirulent clones of capsular serotype K2. *J Med Microbiol* 63:1608–1614.
- 227 18. van Belkum A, Welker M, Pincus D, Charrier JP, Girard V. 2017. Matrix-assisted laser  
228 desorption ionization time-of-flight mass spectrometry in clinical microbiology: what are the  
229 current issues? *Ann Lab Med* 37:475–483.
- 230 19. Berry GJ, Loeffelholz MJ, Williams-Bouyer N. 2015. An investigation into laboratory  
231 misidentification of a bloodstream *Klebsiella variicola* infection. *J Clin Microbiol* 53:2793–4.
- 232 20. Bialek-Davenet S, Criscuolo A, Ailloud F, Passet V, Jones L, Delannoy-Vieillard AS, Garin B,  
233 Hello S Le, Arlet G, Nicolas-Chanoine MH, Decré D, Brisse S. 2014. Genomic definition of  
234 hypervirulent and multidrug-resistant *Klebsiella pneumoniae* clonal groups. *Emerg Infect Dis*  
235 20:1812–1820.
- 236 21. Passet V, Brisse S. 2018. Description of *Klebsiella grimontii* sp. nov. *Int J Syst Evol Microbiol*  
237 68:377–381.
- 238 22. Vranckx K, De Bruyne K, Pot B. 2017. Analysis of MALDI-TOF MS Spectra using the  
239 BioNumerics Software. *MALDI-TOF Tandem MS Clin Microbiol* 539–562.

240

241 **Table 1.** MALDI-TOF mass spectrometry peak biomarkers useful to discriminate *Klebsiella*  
242 *pneumoniae* phylogroups.

| <b>Present in Kp phylogroup(s):</b> | <b>Peak Position<br/>(<i>m/z</i>)<sup>1</sup></b> | <b>Sensitivity</b> | <b>Specificity</b> | <b>Possible proteins<sup>2</sup></b>        |
|-------------------------------------|---------------------------------------------------|--------------------|--------------------|---------------------------------------------|
| <b>Kp1</b>                          | 4152.89                                           | 100%               | 97.3%              | -                                           |
|                                     | 8305.17                                           | 100%               | 100%               | -                                           |
| <b>Kp2</b>                          | 4136.09                                           | 100%               | 100%               | -                                           |
|                                     | 8271.32                                           | 100%               | 100%               | -                                           |
| <b>Kp3 and Kp5</b>                  | 7768.04                                           | 100%               | 100%               | Ribosomal protein L31                       |
| <b>Kp4</b>                          | 3835.01                                           | 100%               | 100%               | -                                           |
|                                     | 7670.21                                           | 100%               | 100%               | Uncharacterized protein<br>specific for Kp4 |
| <b>Kp5</b>                          | 4777.43                                           | 100%               | 100%               | -                                           |
|                                     | 9553.05                                           | 100%               | 100%               | -                                           |
| <b>Kp1 and Kp6</b>                  | 5278.02                                           | 80%                | 100%               | Ribosomal protein S22                       |

<sup>1</sup> Position in the spectra using a tolerance of  $\pm 0.05\%$ .

<sup>2</sup> As determined using TagIdent.

243

244

245

246 **Figure 1.** Peak positions ( $m/z$ ) for each of the *K. pneumoniae* complex strains.

247 Star denotes those peaks that are useful for discrimination among phylogroups, as detailed in Table 1.

248
